# Supplementary material for: The structural changes and sodium storage in the carbon phase of cobalt sulfide/carbon composites
Source: Royal Society of Chemistry journal article supplement (doi:10.1039/d2nj04653a), 2023-01-01
Supplement: d2nj04653a1.pdf [file d2nj04653a1.pdf]

## Supporting Information

### **The structural changes and sodium storage of carbon phase in the cobalt sulfides/carbon composites**

Yaoyao Wang, Hanting Shen, Dan Zhao, Zhong Li\*, Hanqing Zhao\*

State Key Laboratory of Clean and Efficient Coal Utilization, Taiyuan University of  
Technology, Taiyuan 030024, China.

---

\* Corresponding author: zhaohanqing@tyut.edu.cn; hanqing\_zhao1@163.com (Hanqing Zhao)

lizhong@tyut.edu.cn (Zhong Li)

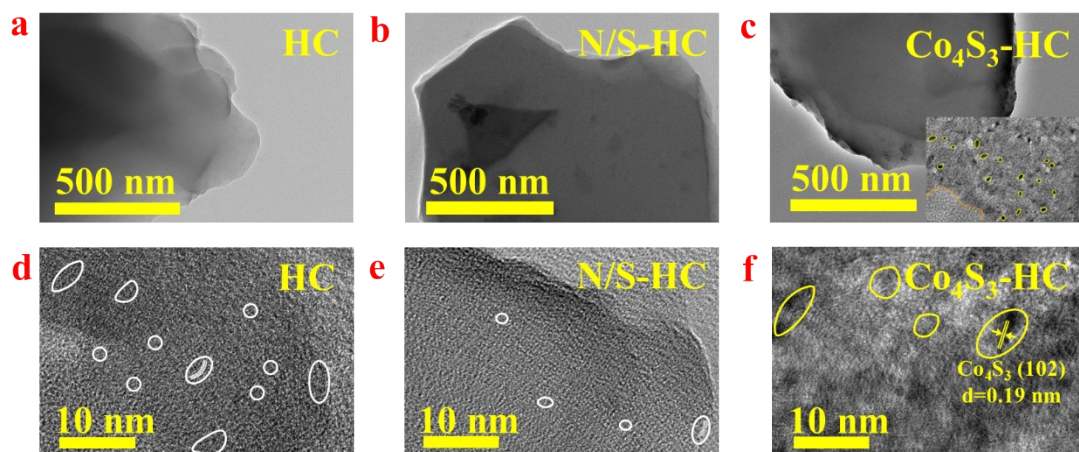

**Fig. S1.** TEM images of (a) HC, (b) N/S-HC, (c) Co<sub>4</sub>S<sub>3</sub>-HC. HRTEM images of (d) HC, (e) N/S-HC, (f) Co<sub>4</sub>S<sub>3</sub>-HC.

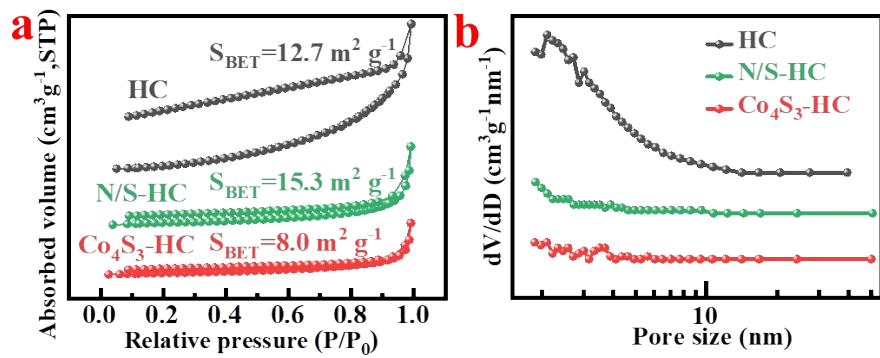

**Fig. S2.** (a)  $\text{N}_2$  adsorption-desorption isothermal curves and (b) pore size distribution plots for HC, N/S-HC and  $\text{Co}_4\text{S}_3\text{-HC}$ .

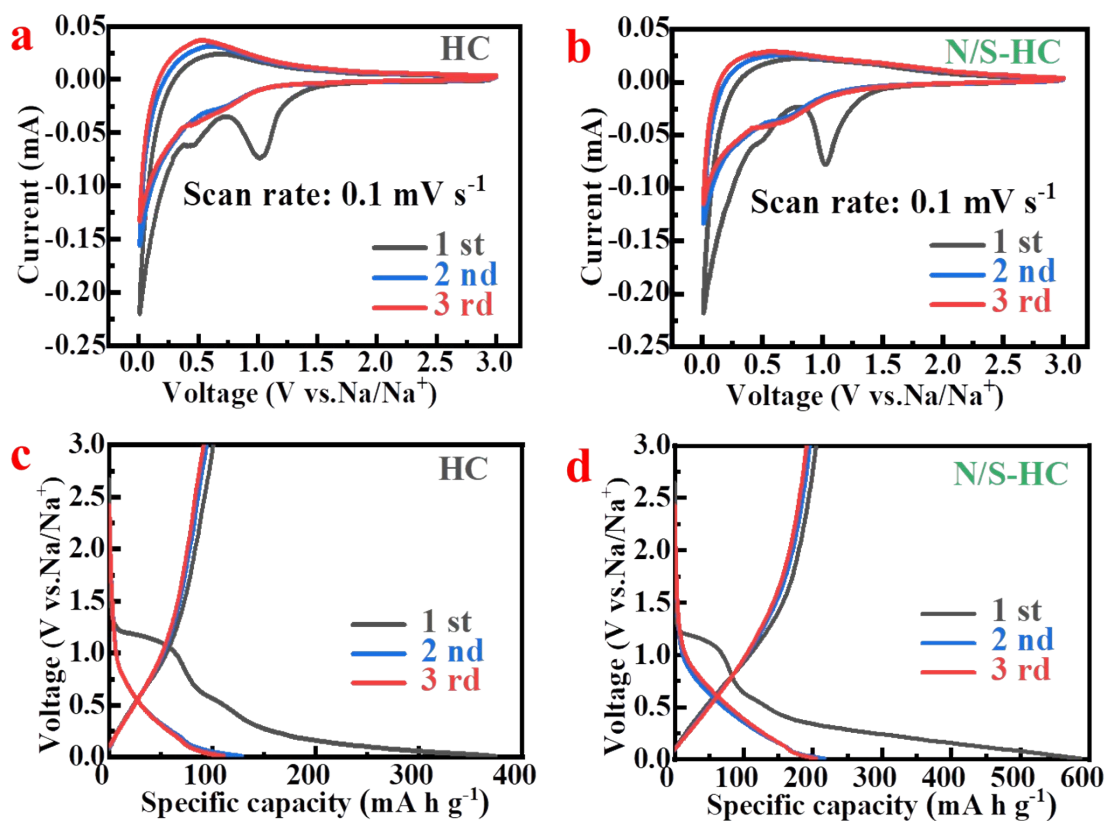

**Fig. S3.** The initial three CV curves at 0.1 mV s<sup>-1</sup> of (a) HC and (b) N/S-HC and the galvanostatic discharge/charge curves at 0.05 A g<sup>-1</sup> of (c) HC and (d) N/S-HC.

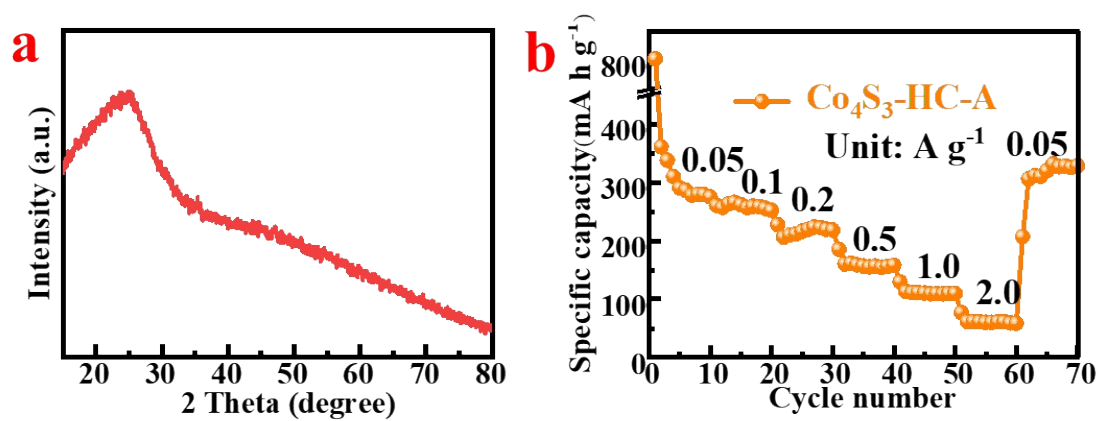

**Fig. S4.** (a)XRD patterns and (b) rate performances of  $\text{Co}_4\text{S}_3\text{-HC-A}$ .

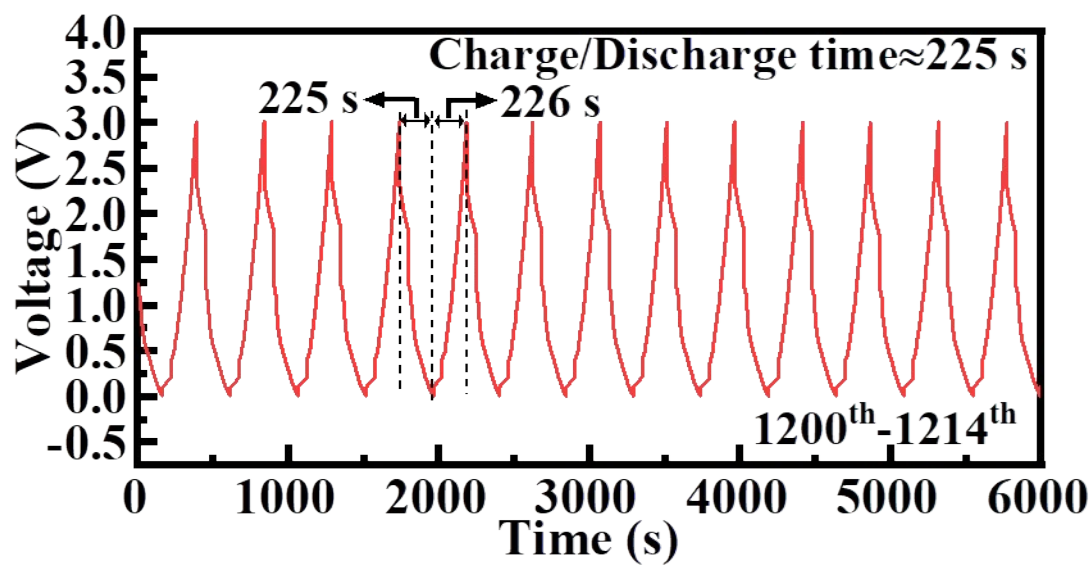

**Fig. S5.** Discharge/charge curves of the 1200<sup>th</sup>-1214<sup>th</sup> cycles at 2.0 A g<sup>-1</sup>.

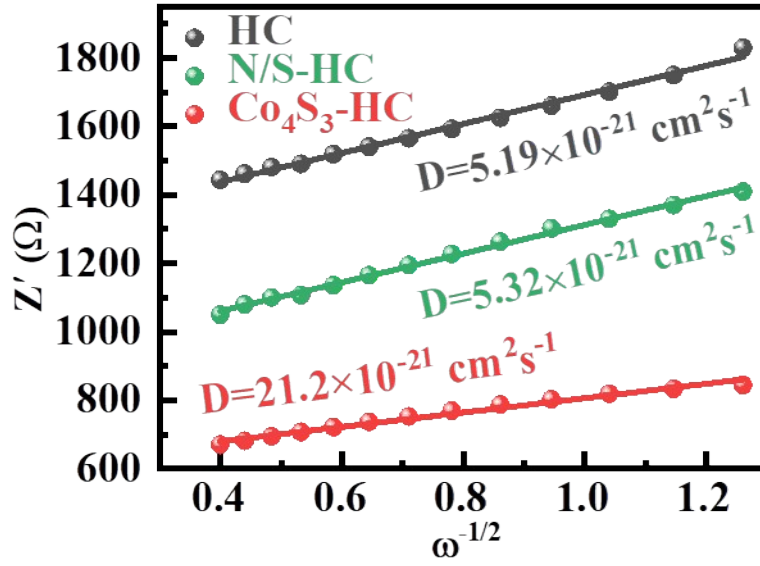

**Fig. S6.** Plots of real part of impedance ( $Z'$ ) in the Warburg region as a function of inverse square root of angular frequency ( $\omega^{-1/2}$ ) for all samples. According to the following Eq. (1), the Warburg coefficient ( $\sigma_w$ ) can be obtained from the slope of Fig. S4 plot.

$$Z' = R_s + R_{ct} + \sigma_w \omega^{-1/2} \quad (1)$$

Then, the  $\text{Na}^+$  diffusion coefficient ( $D_{\text{Na}^+}$ ) can be calculated from Eq. (2)

$$D_{\text{Na}^+} = \frac{R^2 T^2}{2 A^2 n^4 F^4 C_0^2 \sigma_w^2} \quad (2)$$

Where  $R$  is gas constant;  $T$  is temperature;  $A$  is contact area;  $n$  is number of electrons transfer per mole;  $F$  is Faraday constant;  $C_0$  is concentration of  $\text{Na}^+$  in the electrode;  $\sigma_w$  is Warburg coefficient.

**Table. 1** The impedance, the Warburg coefficient and  $\text{Na}^+$  diffusion coefficient of electrodes.

| Samples | $R_{ct}$ ( $\Omega$ ) | $\sigma_w$ ( $\Omega \text{ cm}^2 \text{ s}^{-1/2}$ ) | $D_{\text{Na}^+}$ ( $\text{cm}^2 \text{ s}^{-1}$ ) |
|---------|-----------------------|-------------------------------------------------------|----------------------------------------------------|
| HC      | 988                   | 424.46                                                | $5.19 \times 10^{-21}$                             |
| N/S-HC  | 672                   | 419.29                                                | $5.32 \times 10^{-21}$                             |

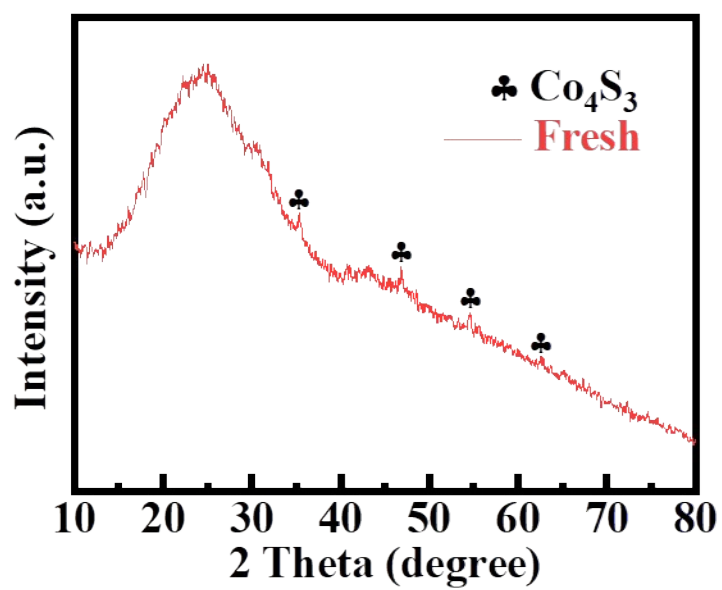

**Fig. S7.** *Ex-situ* XRD pattern of the electrode material from the fresh cells.

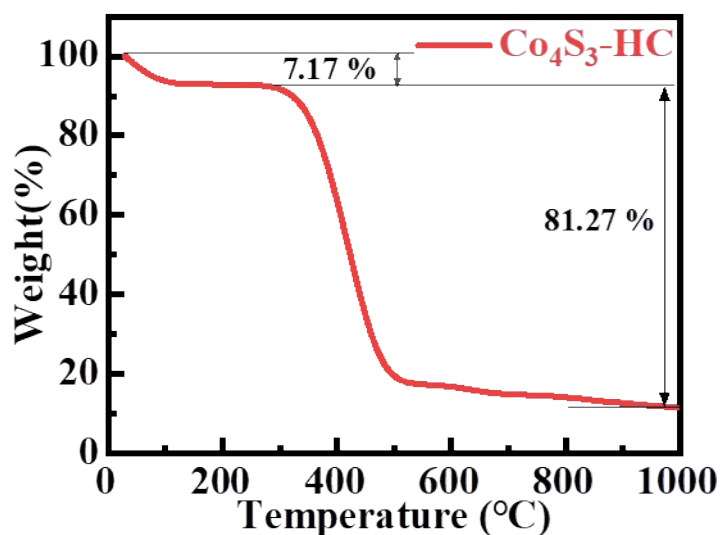

**Fig. S8.** TG curve of Co<sub>4</sub>S<sub>3</sub>-HC in air.

Considering that the combustion product is Co<sub>3</sub>O<sub>4</sub>, and Co does not volatilize within the studied temperature range. Based on the amount of Co, we calculate that the content of Co<sub>4</sub>S<sub>3</sub> in the Co<sub>4</sub>S<sub>3</sub>-HC is 11.9 wt%. And the Co<sub>4</sub>S<sub>3</sub>-HC powder, conductive carbon black and agglomerant polyvinylidene fluoride at the mass ratio of 7:2:1 are mixed and ground. The proportion of Co<sub>4</sub>S<sub>3</sub> in electrode is 8.3 wt%.
